# Supplementary material for: Determinants of Proclivity for Anaesthesia as a Career Among Medical Students in a Southwestern Nigeria Tertiary Institution
Source: Research Square preprint supplement (doi:10.21203/rs.3.rs-7001807/v1), 2025-08-08
Supplement: Supplementary file 1 [file 485d0cc364f4ef3c452e0332.docx]

**SOCIAL DEMOGRAPHICS**

1. Level
2. 500
3. 600
4. Sex
   1. Male
   2. Female
5. Age
   1. Religion
   2. Christianity
   3. Islam
   4. Others
6. Tribe
   1. Yoruba
   2. Igbo
   3. Hausa
   4. Others
7. Average Monthly family income
   1. <50,000
   2. >50,000-100,000
   3. >100,000- 300,000
   4. >300,000-500,000
   5. >500,000
8. Had a doctor in the family before studying medicine
   1. Yes
   2. No
9. Type of relationship to the doctor
   1. Nuclear
   2. Extended
10. Father’s highest level of education
    1. Tertiary
    2. Secondary
    3. Primary
    4. No formal education
11. Mother’s highest level of education
    1. Tertiary
    2. Secondary
    3. Primary
    4. No formal education
12. What's the usual range of your test scores
    1. <50
    2. 50-60
    3. 60-70
    4. 70-80
    5. >80

**PRACTICE CHOICE**

1. Do you intend to practice medicine after graduation?
   1. Yes
   2. No

**SPECIALTY CHOICE**

1. Do you intend to undergo specialty training?
   1. Yes
   2. No
2. Have you chosen a specialty?
   1. Certainly yes
   2. Yet to decide
   3. No idea

**INTEREST IN ANAESTHESIA**

1. Are you in interested in anaesthesia as specialty
   1. Yes
   2. Undecided
   3. No
2. Rank your level of interest in Anaesthesia as a choice of specialty
   1. 1st choice
   2. 2nd choice
   3. 3rd choice
3. When did you make this decision?
   1. Before medical school
   2. Before anaesthesia posting
   3. During anaesthesia posting
   4. After anaesthesia posting

**FACTORS AFFECTING INTEREST IN ANAESTHESIA**

1. If yes, what influenced your choice of interest in Anaesthesia? (Options= Yes, No, Maybe)
2. Personal interest
3. Role model
4. Clinical rotation in the department
5. Intellectually demanding
6. Potentially lucrative
7. Minimal work hours
8. Parental influence
9. Few specialists in the country
10. Working with new technology/procedures
11. Research opportunities
12. Shorter training period
13. Perceived ease of study
14. Prestige of specialty
15. Inspiration and guidance from God
16. Promotion prospects
17. Chose it by exclusion of other specialties

17. If no, what factors prevented you from choosing anaesthesia as a speciality of choice? (Options= Yes, No, Maybe)

1. Low personal interest
2. No role model
3. Clinical rotation in the department
4. Not intellectually demanding
5. Not potentially lucrative
6. Long/ unpredictable work hours
7. Parental influence
8. Few specialists in the country
9. Several specialists in the country
10. Little opportunity to work with new technology/ procedures
11. Fewer opportunity for research
12. Longer training period
13. Perceived difficulty of study
14. Lack of Prestige of specialty
15. Inspiration and guidance from God
16. Little promotion prospects
17. Chose it by exclusion of other specialties

18. What do you think about the following statements regarding anaesthesia as a speciality? (Options= Yes, no)

1. Patient management is at surgery only
2. Works in various parts of the hospital
3. Play vital role in patient management
4. Not needed because of anaesthetic nurses

**EMIGRATION INTENTIONS**

19. Do you intend to practice in Nigeria?

1. Yes
2. No
